# Supplementary material for: 1km Monthly Precipitation and Temperatures Dataset for China from 1952 to 2019 based on a Brand-New and High-Quality Baseline Climatology Surface
Source: Copernicus journal article supplement (doi:10.5194/essd-2022-45), 2022-03-01
Supplement: Supplementary file 1 [file Supplement.docx]

Table S1. The different model combinations were test to choose the optimal TPS model for ChinaClim_baseline.

|  | **Precipitation** | **Temperature elements** |
| --- | --- | --- |
| Model **1** | F(x,y,z)+coast | F(x,y,z)+coast |
| Model **2** | F(x,y,z,coast)+trmm_m | F(x,y,z,coast)+lst_m |
| Model **3** | F(x,y,z,trmm_m)+coast | F(x,y,z, lst_m)+coast |
| Model **4** | F(x,y,z)+coast+trmm_m | F(x,y,z)+coast+ lst_m |
| Model **5** | F(x,y,z,coast,trmm_y)+trmm_m | F(x,y,z,coast, lst_y)+ lst_m |
| Model **6** | F(x,y,z,coast,trmm_m)+Trmm_y | F(x,y,z,coast, lst_m)+ lst_y |
| Model **7** | F(x,y,z,trmm_m,trmm_y)+coast | F(x,y,z, lst_m, lst _y)+coast |
| Model **8** | F(x,y,z,trmm_y)+coast+Trmm_m | F(x,y,z lst_y)+coast+ lst_m |
| Model **9** | F(x,y,z,coast)+trmm_m+trmm_y | F(x,y,z,coast)+ lst _m+ lst_y |
| Model **10** | F(x,y,z,Trmm_m)+coast+trmm_y | F(x,y,z, lst_m)+coast+ lst_y |
| Model **11** | F(x,y,z)+coast+trmm_m+trmm_y | F(x,y,z)+coast+ lst_m+ lst_y |

Note：lst_m and lst_y represented the average of the day and night LST) during 2001-2019 averaged by month (lst_dm, lst_nm, lst_am) and year (lst_dy, lst_ny, lst_ay), respectively.

Table S2. Tenfold spatially stratified cross-validation statistics for selected models in different months over Temperate continental region.

|  | Jan | Feb | Mar | Apr | May | Jun | Jul | Aug | Sep | Oct | Nov | Dec |
| --- | --- | --- | --- | --- | --- | --- | --- | --- | --- | --- | --- | --- |
| Precipitation | Model **5** | Model **5** | Model **2** | Model **6** | Model **5** | Model **7** | Model **7** | Model **6** | Model **7** | Model **7** | Model **1** | Model **5** |
| Average temperature | Model **1** | Model **11** | Model **4** | Model **4** | Model **11** | Model **11** | Model **1** | Model **11** | Model **1** | Model **4** | Model **4** | Model **4** |
| Maximum temperature | Model **4** | Model **4** | Model **4** | Model **11** | Model **4** | Model **6** | Model **1** | Model **4** | Model **1** | Model **1** | Model **1** | Model **1** |
| Minimum temperature | Model **7** | Model **11** | Model **6** | Model **4** | Model **4** | Model **6** | Model **11** | Model **11** | Model **1** | Model **6** | Model **11** | Model **1** |

Table S3. Tenfold spatially stratified cross-validation statistics for selected models in different months over High cold Tibetan Plateau.

|  | Jan | Feb | Mar | Apr | May | Jun | Jul | Aug | Sep | Oct | Nov | Dec |
| --- | --- | --- | --- | --- | --- | --- | --- | --- | --- | --- | --- | --- |
| Precipitation | Model **11** | Model **5** | Model **5** | Model **5** | Model **5** | Model **6** | Model **7** | Model **5** | Model **5** | Model **7** | Model **5** | Model **11** |
| Average temperature | Model **1** | Model **1** | Model **4** | Model **4** | Model **9** | Model **1** | Model **6** | Model **6** | Model 4 | Model **1** | Model **1** | Model **11** |
| Maximum temperature | Model **1** | Model **4** | Model **9** | Model **6** | Model **9** | Model **9** | Model **1** | Model **9** | Model **2** | Model **4** | Model **1** | Model **6** |
| Minimum temperature | Model **1** | Model **1** | Model **11** | Model **1** | Model **1** | Model **6** | Model **6** | Model **9** | Model **1** | Model **1** | Model **11** | Model **4** |

Table S4. Tenfold spatially stratified cross-validation statistics for selected models in different months over Temperate monsoonal region.

|  | Jan | Feb | Mar | Apr | May | Jun | Jul | Aug | Sep | Oct | Nov | Dec |
| --- | --- | --- | --- | --- | --- | --- | --- | --- | --- | --- | --- | --- |
| Prep | Model **4** | Model **4** | Model **4** | Model **7** | Model **7** | Model **6** | Model **9** | Model **4** | Model **11** | Model **11** | Model **7** | Model **6** |
| Tavg | Model **4** | Model **1** | Model **4** | Model **4** | Model **4** | Model **1** | Model **4** | Model **4** | Model **4** | Model **1** | Model **6** | Model **4** |
| Tmax | Model **11** | Model **11** | Model **5** | Model **9** | Model **1** | Model **1** | Model **4** | Model **1** | Model **1** | Model **4** | Model **6** | Model **6** |
| Tmin | Model **11** | Model **4** | Model **2** | Model **11** | Model **11** | Model **11** | Model **9** | Model **9** | Model **9** | Model **4** | Model **11** | Model **1** |

Table S5. Tenfold spatially stratified cross-validation statistics for selected models in different months over Subtropical-tropical monsoonal region.

|  | Jan | Feb | Mar | Apr | May | Jun | Jul | Aug | Sep | Oct | Nov | Dec |
| --- | --- | --- | --- | --- | --- | --- | --- | --- | --- | --- | --- | --- |
| Prep | Model **8** | Model **6** | Model **7** | Model **5** | Model **5** | Model **11** | Model **6** | Model **4** | Model **6** | Model **7** | Model **6** | Model **9** |
| Tavg | Model **1** | Model **1** | Model **1** | Model **11** | Model **9** | Model **4** | Model **1** | Model **1** | Model **11** | Model **9** | Model **1** | Model **1** |
| Tmax | Model **11** | Model **4** | Model **1** | Model **4** | Model **9** | Model **1** | Model **4** | Model **11** | Model **4** | Model **1** | Model **4** | Model **1** |
| Tmin | Model **11** | Model **1** | Model **1** | Model **4** | Model **4** | Model **2** | Model **9** | Model **2** | Model **9** | Model **11** | Model **1** | Model **4** |

Table S6. The different model combinations were test to choose the optimal TPS model for ChinaClim_time-series

|  | **Precipitation** | **Temperature elements** |
| --- | --- | --- |
| Model **1** | F(x,y,z,base,coast)+cru_r | F(x,y,z,base,coast)+cru_a |
| Model **2** | F(x,y,z,base,cru_r)+coast | F(x,y,z,base,cru_a)+coast |
| Model **3** | F(x,y,z,coast,cru_r)+base | F(x,y,z,coast,cru_a)+base |
| Model **4** | F(x,y,z,base)+coast+cru_r | F(x,y,z,base)+coast+cru_a |
| Model **5** | F(x,y,z,coast)+cru_r+base | F(x,y,z,coast)+cru_a+base |
| Model **6** | F(x,y,z,base)+base +coast | F(x,y,z, cru_a)+base+coast |
| Model **7** | F(x,y,z)+cru_r+base+coast | F(x,y,z)+cru_a+base+coast |
| Model **1a** | F(x,y,z,base,coast)+cru_r+trmm_r | F(x,y,z,base,coast)+cru_a+lst_a |
| Model **1b** | F(x,y,z,base,coast,trmm_r)+cru_r | F(x,y,z,base,coast,lst_a)+cru_a |
| Model **7a** | F(x,y,z,trmm_r)+cru_r+base+coast | F(x,y,z,lst_a)+cru_a+base+coast |
| Model **7b** | F(x,y,z)+cru_r+base+coast+trmm_r | F(x,y,z)+cru_a+base+coast+lst_a |

Note：base was the 30-Year Normals; trmm_r was monthly precipitation ratio from TRMM 3B43; lst_a was monthly temperature anomaly from Modis LST; cru_r and cru_a represented monthly precipitation ratio and temperature anomaly from CRU, respectively.

Table S7. The optimal model formulations for ChinaClim_timeseries.during 1952-2019

|  | Jan | Feb | Mar | Apr | May | Jun | Jul | Aug | Sep | Oct | Nov | Dec |
| --- | --- | --- | --- | --- | --- | --- | --- | --- | --- | --- | --- | --- |
| Prep | Model **7** | Model 1 | Model **7** | Model **7** | Model **7** | Model **7** | Model **7** | Model **7** | Model **7** | Model **7** | Model **7** | Model **7** |
| Tavg | Model **1** | Model **1** | Model **1** | Model **7** | Model **7** | Model **7** | Model **7** | Model **7** | Model **7** | Model **7** | Model **7** | Model **1** |
| Tmax | Model **1** | Model **1** | Model **1** | Model **7** | Model **7** | Model **7** | Model **7** | Model **7** | Model **7** | Model **7** | Model **1** | Model **1** |
| Tmin | Model **7** | Model **7** | Model **7** | Model **7** | Model **7** | Model **7** | Model **7** | Model **7** | Model **7** | Model **7** | Model **7** | Model **7** |

Table S8. The optimal model formulations for ChinaClim_timeseries. (Precipitation: 1998-2019; Temperature: 2001-2019)

|  | Jan | Feb | Mar | Apr | May | Jun | Jul | Aug | Sep | Oct | Nov | Dec |
| --- | --- | --- | --- | --- | --- | --- | --- | --- | --- | --- | --- | --- |
| Prep | Model **7b** | Model **1a** | Model **7b** | Model **7b** | Model **7b** | Model **7b** | Model **7b** | Model **7b** | Model **7b** | Model **7b** | Model **7b** | Model **7b** |
| Tavg | Model **1a** | Model **1a** | Model **1a** | Model **7b** | Model **7b** | Model **7b** | Model **7b** | Model **7b** | Model **7b** | Model **7b** | Model **7b** | Model **1a** |
| Tmax | Model **1a** | Model **1a** | Model **1a** | Model **7b** | Model **7b** | Model **7b** | Model **7b** | Model **7b** | Model **7b** | Model **7b** | Model **1a** | Model **1a** |
| Tmin | Model **7b** | Model **7b** | Model **7** | Model **7b** | Model **7b** | Model **7b** | Model **7b** | Model **7b** | Model **7b** | Model **7b** | Model **7b** | Model **7b** |


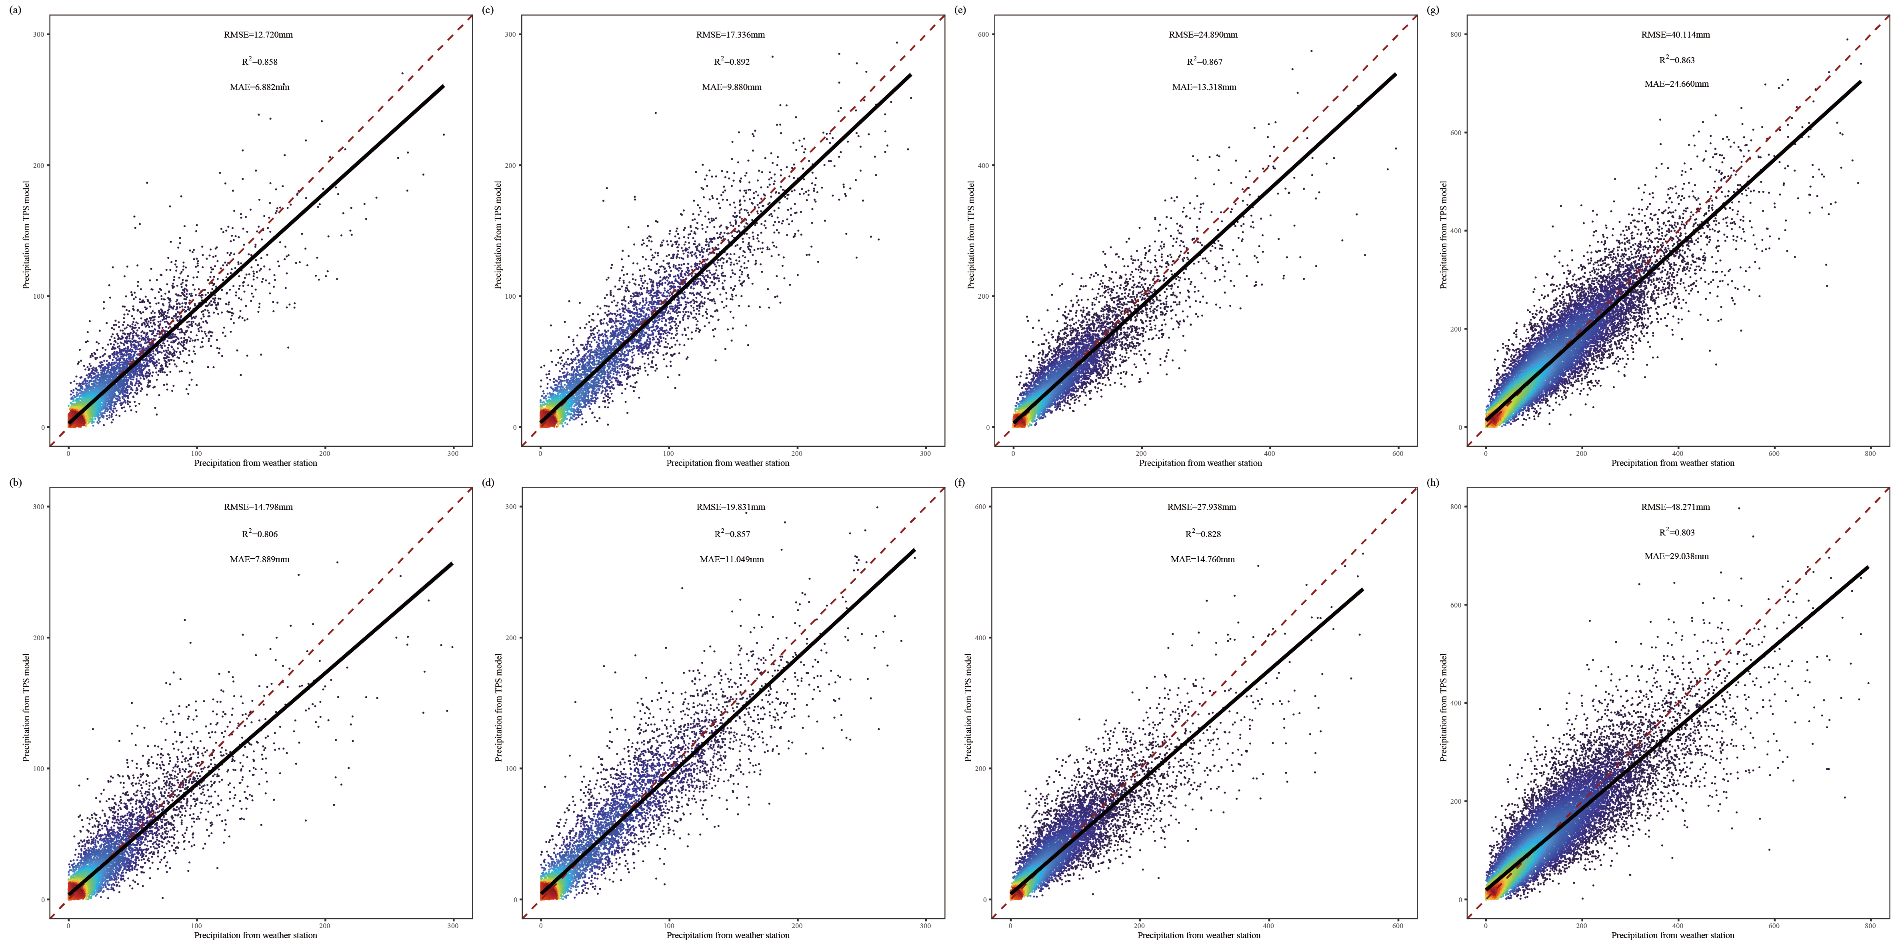


Figure S1. Density scatter plots of precipitation in Temperate continental region (a, b), High cold Tibetan Plateau (c, d), Temperate monsoonal region (e, f), Subtropical-tropical monsoonal region (g, h). The first row represented precipitation model with satellite-driven data; the second row represented precipitation model without satellite-driven data.


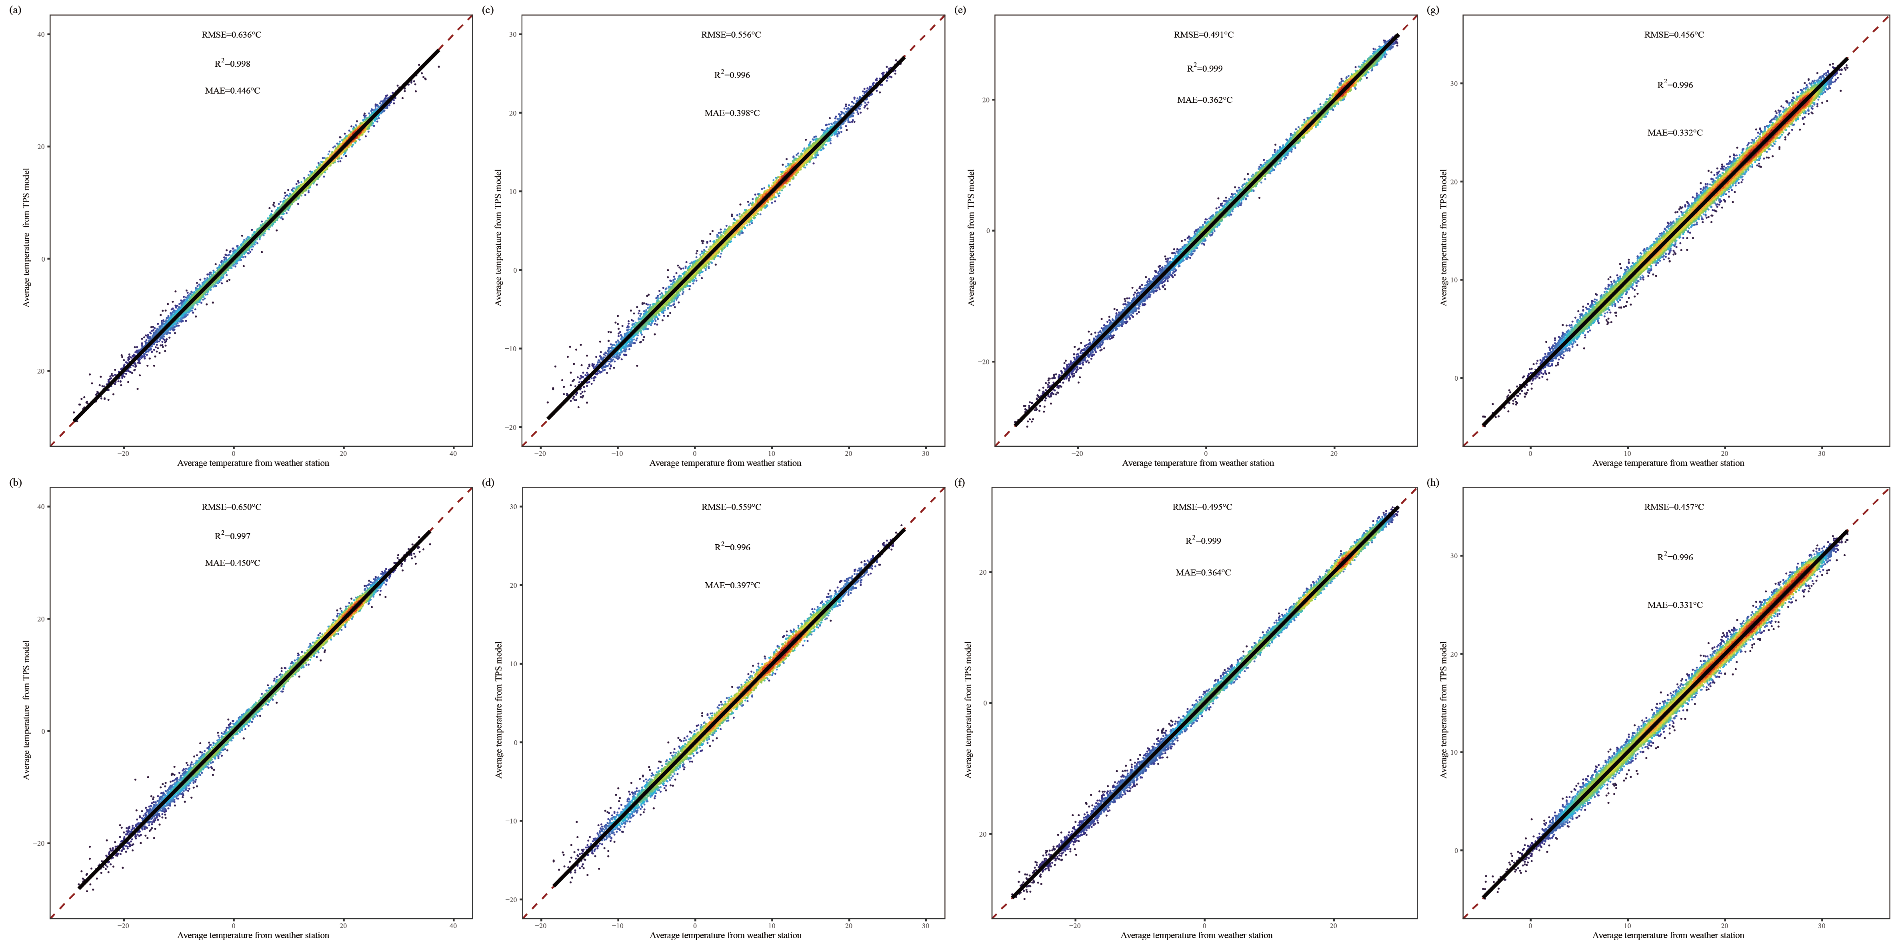


Figure S2. Density scatter plots of average temperature in Temperate continental region (a, b), High cold Tibetan Plateau (c, d), Temperate monsoonal region (e, f), Subtropical-tropical monsoonal region (g, h). The first row represented average temperature model with satellite-driven data; the second row represented average temperature model without satellite-driven data.


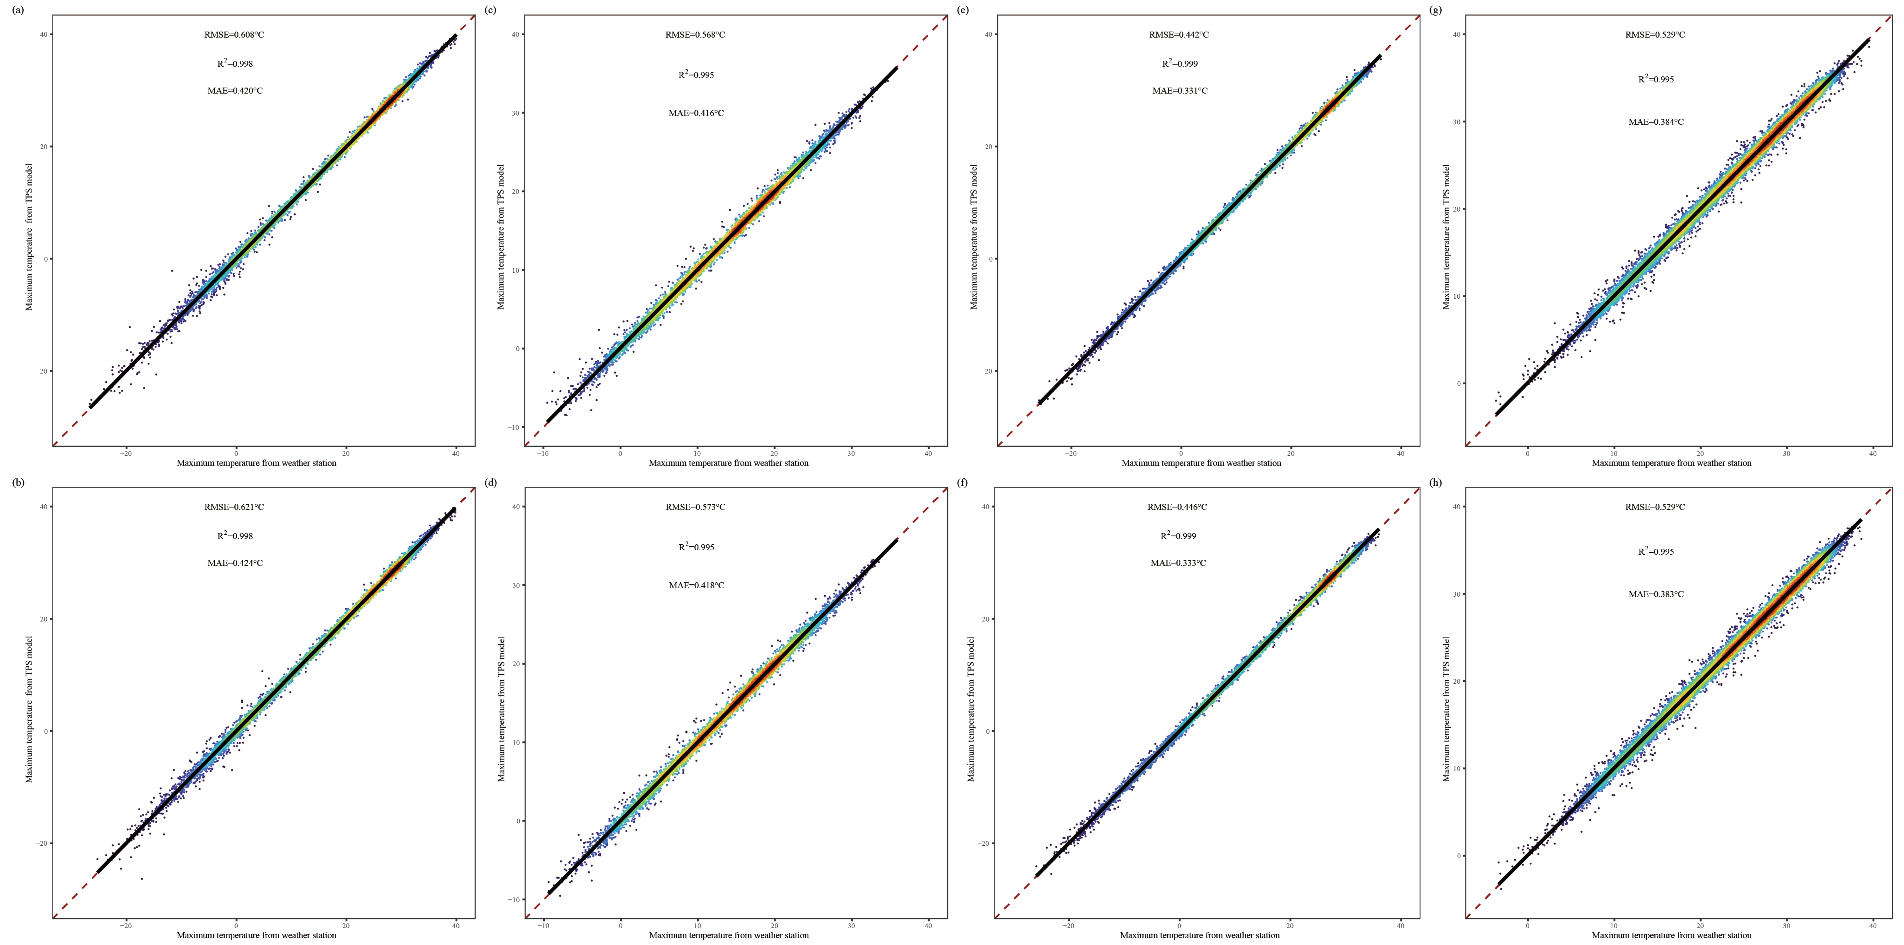


Figure S3. Density scatter plots of maximum temperature in Temperate continental region (a, b), High cold Tibetan Plateau (c, d), Temperate monsoonal region (e, f), Subtropical-tropical monsoonal region (g, h). The first row represented maximum temperature model with satellite-driven data; the second row represented maximum temperature model without satellite-driven data.


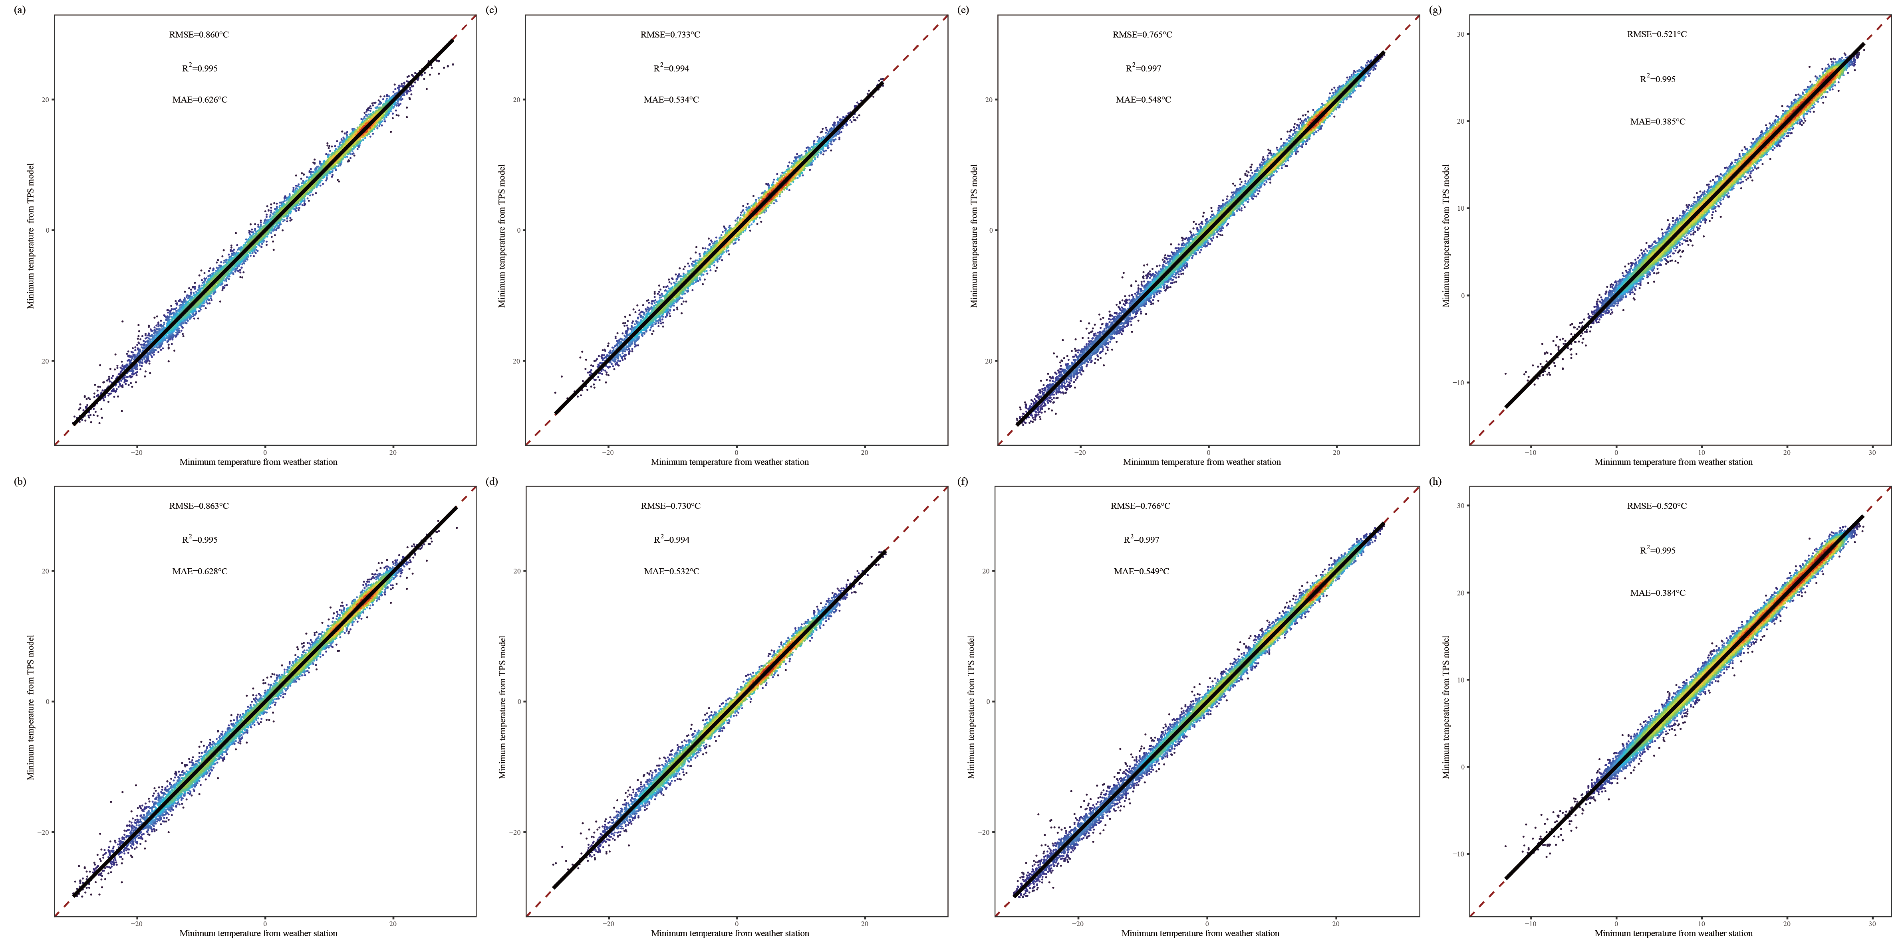


Figure S4. Density scatter plots of minimum temperature in Temperate continental region (a, b), High cold Tibetan Plateau (c, d), Temperate monsoonal region (e, f), Subtropical-tropical monsoonal region (g, h). The first row represented minimum temperature model with satellite-driven data; the second row represented minimum temperature model without satellite-driven data.
